# Supplementary material for: Introduction of standardised packaging and availability of illicit cigarettes: a difference-in-difference analysis of European Union survey data 2015–2018
Source: HighWire-hosted journal article supplement (doi:10.1136/thoraxjnl-2020-215708), 2020-10-22
Supplement: thoraxjnl-2020-215708supp001_data_supplement.pdf [file thoraxjnl-2020-215708supp001_data_supplement.pdf]

**Supplementary Table 1. Percentages of reporting being offered illicit cigarettes by individual country and year**

|                                                      | Offered rarely, occasionally or regularly<br>Weighted % (95% CI) |                  | Offered occasionally or regularly<br>Weighted % (95% CI) |                  | Offered regularly<br>Weighted % (95% CI) |               |
|------------------------------------------------------|------------------------------------------------------------------|------------------|----------------------------------------------------------|------------------|------------------------------------------|---------------|
|                                                      | 2015                                                             | 2018             | 2015                                                     | 2018             | 2015                                     | 2018          |
| <i>COUNTRIES IMPLEMENTING STANDARDISED PACKAGING</i> |                                                                  |                  |                                                          |                  |                                          |               |
| France                                               | 18.3 (15.9-21.0)                                                 | 19.4 (16.8-22.4) | 4.1 (2.9-5.7)                                            | 5.5 (4.1-7.5)    | 1.5 (0.9-2.6)                            | 1.6 (0.9-3.0) |
| Ireland                                              | 25.6 (22.8-28.5)                                                 | 15.1 (12.8-17.7) | 10.1 (8.3-12.3)                                          | 5.2 (3.8-7.0)    | 3.4 (2.4-4.8)                            | 2.2 (1.3-3.5) |
| United Kingdom                                       | 21.0 (18.5-23.8)                                                 | 16.8 (14.0-20.1) | 9.9 (8.1-12.1)                                           | 7.6 (5.7-9.9)    | 3.9 (2.8-5.4)                            | 2.9 (1.9-4.4) |
| <i>COUNTRIES WITHOUT STANDARDISED PACKAGING</i>      |                                                                  |                  |                                                          |                  |                                          |               |
| Austria                                              | 23.6 (20.9-26.6)                                                 | 18.1 (15.8-20.7) | 5.5 (4.2-7.2)                                            | 4.8 (3.6-6.3)    | 1.3 (0.7-2.2)                            | 0.5 (0.2-1.2) |
| Belgium                                              | 9.4 (7.7-11.5)                                                   | 9.3 (7.6-11.4)   | 1.8 (1.1-2.8)                                            | 1.1 (0.7-1.8)    | 0.9 (0.5-1.6)                            | 0.5 (0.2-1.2) |
| Bulgaria                                             | 34.2 (31.3-37.2)                                                 | 27.1 (24.3-30.0) | 18.8 (16.5-21.3)                                         | 10.3 (8.5-12.4)  | 8.8 (7.2-10.7)                           | 2.8 (1.9-4.1) |
| Croatia                                              | 33.8 (30.8-37.0)                                                 | 32.4 (29.3-35.5) | 14.6 (12.4-17.0)                                         | 12.6 (10.6-14.9) | 3.2 (2.3-4.6)                            | 3.8 (2.8-5.1) |
| Cyprus                                               | 12.9 (9.9-16.5)                                                  | 11.7 (8.7-15.5)  | 6.7 (4.5-9.8)                                            | 3.3 (1.9-5.5)    | 2.4 (1.2-4.9)                            | 1.7 (0.8-3.6) |
| Czech Republic                                       | 18.4 (15.9-21.0)                                                 | 15.9 (13.7-18.5) | 4.8 (3.6-6.3)                                            | 4.6 (3.4-6.2)    | 1.7 (1.1-2.7)                            | 1.3 (0.7-2.3) |
| Denmark                                              | 20.1 (17.5-23.0)                                                 | 22.3 (19.2-25.8) | 3.4 (2.4-5.0)                                            | 5.6 (4.1-7.8)    | 0.8 (0.4-1.6)                            | 2.9 (1.8-4.5) |
| Estonia                                              | 21.8 (19.0-24.8)                                                 | 22.0 (19.1-25.2) | 5.3 (3.9-7.1)                                            | 6.4 (4.8-8.5)    | 2.4 (1.5-3.9)                            | 2.2 (1.4-3.4) |
| Finland                                              | 19.2 (16.6-22.2)                                                 | 15.5 (13.1-18.3) | 3.1 (2.1-4.5)                                            | 2.6 (1.7-4.1)    | 0.6 (0.2-1.3)                            | 1.1 (0.5-2.2) |
| Germany                                              | 19.4 (17.1-21.9)                                                 | 17.6 (15.4-20.0) | 4.3 (3.3-5.7)                                            | 4.5 (3.4-5.9)    | 1.5 (0.9-2.4)                            | 1.3 (0.8-2.1) |
| Greece                                               | 27.6 (24.8-30.7)                                                 | 28.9 (25.9-32.2) | 9.6 (7.8-11.7)                                           | 9.4 (7.4-11.7)   | 3.6 (2.6-5.0)                            | 2.3 (1.4-3.8) |
| Hungary*                                             | 29.1 (26.0-32.3)                                                 | 16.7 (14.4-19.4) | 9.3 (7.4-11.6)                                           | 4.0 (2.8-5.5)    | 1.9 (1.2-3.1)                            | 0.7 (0.3-1.8) |
| Italy                                                | 10.3 (8.3-12.7)                                                  | 12.4 (10.4-14.7) | 3.1 (2.1-4.5)                                            | 3.9 (2.8-5.3)    | 0.5 (0.2-1.3)                            | 0.6 (0.3-1.3) |
| Latvia                                               | 56.3 (53.0-59.7)                                                 | 43.4 (40.1-46.8) | 23.2 (20.3-26.2)                                         | 16.3 (14.0-18.9) | 10.4 (8.4-12.7)                          | 6.9 (5.3-8.8) |
| Lithuania                                            | 35.7 (32.2-39.3)                                                 | 28.8 (25.7-32.1) | 16.1 (13.5-19.1)                                         | 13.1 (10.9-15.7) | 6.8 (5.1-9.0)                            | 6.8 (5.2-8.9) |
| Luxembourg                                           | 5.9 (3.8-8.9)                                                    | 8.3 (5.8-11.7)   | 0 (0-0)                                                  | 1.4 (0.6-3.2)    | 0 (0-0)                                  | 0.5 (0.1-2.3) |
| Malta                                                | 15.8 (12.4-20.0)                                                 | 11.6 (8.4-15.9)  | 5.2 (3.3-8.3)                                            | 5.9 (3.7-9.5)    | 1.4 (0.7-3.0)                            | 1.0 (0.4-2.4) |
| Netherlands                                          | 14.7 (12.4-17.3)                                                 | 11.2 (9.2-13.7)  | 3.2 (2.1-4.7)                                            | 1.8 (1.1-3.1)    | 0.9 (0.5-1.7)                            | 0.8 (0.3-2.1) |
| Poland                                               | 23.8 (21.1-26.8)                                                 | 16.3 (14.0-18.9) | 10.2 (8.3-12.3)                                          | 5.6 (4.3-7.3)    | 3.9 (2.8-5.4)                            | 2.5 (1.6-3.8) |
| Portugal                                             | 9.6 (7.9-11.7)                                                   | 7.5 (5.9-9.5)    | 2.1 (1.3-3.3)                                            | 1.6 (0.9-2.7)    | 1.1 (0.6-2.0)                            | 0.5 (0.2-1.3) |
| Romania                                              | 26.9 (24.1-30.0)                                                 | 16.1 (14.0-18.6) | 14.2 (12.0-16.6)                                         | 6.8 (5.4-8.5)    | 6.1 (4.8-7.9)                            | 1.9 (1.2-3.0) |
| Slovakia                                             | 18.5 (16.0-21.4)                                                 | 15.4 (12.9-18.3) | 4.0 (2.8-5.6)                                            | 3.8 (2.6-5.5)    | 1.1 (0.6-2.2)                            | 0.6 (0.3-1.4) |
| Slovenia                                             | 18.5 (16.0-21.3)                                                 | 16.5 (14.2-19.0) | 5.6 (4.2-7.4)                                            | 3.9 (2.8-5.3)    | 1.9 (1.2-2.9)                            | 1.5 (0.8-2.5) |
| Spain                                                | 21.7 (19.0-24.8)                                                 | 21.4 (18.9-24.1) | 6.6 (5.0-8.6)                                            | 9.0 (7.4-11.0)   | 3.3 (2.3-4.8)                            | 3.4 (2.5-4.7) |
| Sweden                                               | 17.2 (14.1-20.8)                                                 | 15.4 (12.9-18.3) | 2.1 (1.3-3.6)                                            | 2.6 (1.6-4.1)    | 0.9 (0.4-2.1)                            | 0.8 (0.4-2.0) |

\* Hungary introduced legislation so that from August 2016 all new tobacco products had to be in standardised packaging. Initially, all tobacco products were to be in standardised packaging from May 2019, although this date has now been postponed until 1 January 2022.

**Supplementary Table 2. Full regression results and sensitivity analyses from ordered logistic regression of changes in odds of frequency of having been offered illicit cigarettes between 2015 and 2018 in countries which introduced plain packaging and those which didn't.**

|                                                                                                         | Entire sample<br>(n=52,889)<br>aOR (95% CI) | Current smokers<br>only (n=13,665)<br>aOR (95% CI) | Countries without<br>land borders with<br>non-EEA countries<br>only (n=30,677)<br>aOR (95% CI) |
|---------------------------------------------------------------------------------------------------------|---------------------------------------------|----------------------------------------------------|------------------------------------------------------------------------------------------------|
| <b>Difference in difference estimate<br/>(Interaction term (Country with plain<br/>packaging*Year))</b> | 0.93 (0.80-1.07)                            | 1.10 (0.87-1.38)                                   | 0.78 (0.67-0.91)                                                                               |
| p-value for interaction term                                                                            | 0.320                                       | 0.426                                              | 0.002                                                                                          |
| Country with plain packaging                                                                            |                                             |                                                    |                                                                                                |
| No                                                                                                      | ref                                         | ref                                                | ref                                                                                            |
| Yes                                                                                                     | 1.25 (0.60-2.58)                            | 1.20 (0.51-2.85)                                   | 1.74 (0.94-3.23)                                                                               |
| Year                                                                                                    |                                             |                                                    |                                                                                                |
| 2015                                                                                                    | ref                                         | ref                                                | ref                                                                                            |
| 2018                                                                                                    | 0.92 (0.85-0.99)                            | 0.92 (0.82-1.03)                                   | 1.16 (1.05-1.30)                                                                               |
| Smoking                                                                                                 |                                             |                                                    |                                                                                                |
| Never smoker                                                                                            | ref                                         | -                                                  | ref                                                                                            |
| Former smoker                                                                                           | 4.60 (4.31-4.91)                            | -                                                  | 4.48 (4.10-4.90)                                                                               |
| Current smoker                                                                                          | 7.36 (6.93-7.83)                            | -                                                  | 6.27 (5.75-6.85)                                                                               |
| Sex                                                                                                     |                                             |                                                    |                                                                                                |
| Male                                                                                                    | ref                                         | ref                                                | ref                                                                                            |
| Female                                                                                                  | 0.58 (0.55-0.61)                            | 0.56 (0.52-0.60)                                   | 0.54 (0.50-0.57)                                                                               |
| Age group (in years)                                                                                    |                                             |                                                    |                                                                                                |
| 15-24                                                                                                   | ref                                         | ref                                                | ref                                                                                            |
| 25-39                                                                                                   | 1.15 (1.03-1.28)                            | 1.03 (0.89-1.19)                                   | 1.12 (0.96-1.31)                                                                               |
| 40-54                                                                                                   | 1.08 (0.97-1.22)                            | 1.00 (0.87-1.17)                                   | 0.96 (0.82-1.13)                                                                               |
| 55+                                                                                                     | 0.72 (0.64-0.81)                            | 0.82 (0.70-0.95)                                   | 0.53 (0.45-0.62)                                                                               |
| Area of residence                                                                                       |                                             |                                                    |                                                                                                |
| Rural (ref)                                                                                             | ref                                         | ref                                                | ref                                                                                            |
| Small city                                                                                              | 1.21 (1.14-1.28)                            | 1.23 (1.12-1.34)                                   | 1.19 (1.09-1.29)                                                                               |
| Urban                                                                                                   | 1.42 (1.34-1.51)                            | 1.36 (1.24-1.49)                                   | 1.46 (1.33-1.59)                                                                               |
| Difficulty paying bills                                                                                 |                                             |                                                    |                                                                                                |
| Never/Almost never                                                                                      | ref                                         | ref                                                | ref                                                                                            |
| From time to time                                                                                       | 1.31 (1.24-1.38)                            | 1.43 (1.32-1.56)                                   | 1.30 (1.19-1.41)                                                                               |
| Most of the time                                                                                        | 1.88 (1.74-2.04)                            | 2.24 (2.01-2.50)                                   | 1.97 (1.74-2.21)                                                                               |
| Age when stopped full-time<br>education (in years)                                                      |                                             |                                                    |                                                                                                |
| ≤15                                                                                                     | ref                                         | ref                                                | ref                                                                                            |
| 16-19                                                                                                   | 1.23 (1.14-1.33)                            | 1.08 (0.96-1.20)                                   | 1.17 (1.05-1.29)                                                                               |
| ≥20                                                                                                     | 1.18 (1.09-1.28)                            | 1.02 (0.90-1.15)                                   | 1.03 (0.93-1.15)                                                                               |
| Still studying                                                                                          | 1.24 (1.06-1.44)                            | 0.90 (0.72-1.12)                                   | 1.10 (0.90-1.34)                                                                               |
| Employment                                                                                              |                                             |                                                    |                                                                                                |
| Employed                                                                                                | ref                                         | ref                                                | ref                                                                                            |
| Unemployed                                                                                              | 1.26 (1.15-1.37)                            | 1.22 (1.09-1.36)                                   | 1.23 (1.09-1.40)                                                                               |
| Weighted Average Price (per 1 EUR)                                                                      | 1.00 (0.91-1.09)                            | 1.05 (0.92-1.20)                                   | 1.03 (0.94-1.12)                                                                               |
| Gross Domestic Product (per 1,000<br>EUR)                                                               | 0.98 (0.97-0.99)                            | 0.97 (0.96-0.99)                                   | 0.98 (0.97-0.99)                                                                               |
| Corruption Perception Index (per 10<br>points)                                                          | 1.16 (1.02-1.32)                            | 1.13 (0.96-1.33)                                   | 1.33 (1.14-1.56)                                                                               |
| Tobacco Control Scale score                                                                             | 1.01 (0.99-1.02)                            | 1.00 (0.99-1.02)                                   | 0.99 (0.97-1.00)                                                                               |

*aOR = adjusted odds ratio*

*Result from ordered logistic regression adjusted for factors at the individual and country level.*

*Ordered logistic regression estimates represent odds of being in higher category of having been offered illicit cigarettes using responses never; rarely; occasionally; frequently. Estimates greater than one representing greater frequency of being offered illicit cigarettes and vice versa*

*Individual level factors: age, sex, residence type (rural, small city, urban), age when completed education, employment (yes, no), smoking status (current, former, never), difficulty paying bills (never/almost never, from time to time, most of the time).*

*Country level factors: Corruption Perception Index, GDP per capita, tobacco control score (excluding price) and weighted average price of cigarettes)*

**Supplementary Table 3. Difference-in-Difference regression results excluding Hungary\* from ordered logistic regression of changes in odds of frequency of having been offered illicit cigarettes between 2015 and 2018 in countries which introduced plain packaging and those which didn't.**

|  |                                                                                          |                                |
|--|------------------------------------------------------------------------------------------|--------------------------------|
|  |                                                                                          | Sample = 50814<br>aOR (95% CI) |
|  | Difference in difference estimate (Interaction term (Country with plain packaging*Year)) | 0.91 (0.79-1.06)               |
|  | p-value for interaction term                                                             | 0.236                          |
|  | Country with plain packaging                                                             |                                |
|  | No                                                                                       | Ref                            |
|  | Yes                                                                                      | 1.31 (0.63-1.71)               |
|  | Year                                                                                     |                                |
|  | 2015                                                                                     | Ref                            |
|  | 2018                                                                                     | 0.92 (0.85-0.99)               |

\* Hungary introduced legislation so that from August 2016 all new tobacco products had to be in standardised packaging. Initially, all tobacco products were to be in standardised packaging from May 2019, although this date has now been postponed until 1 January 2022.
